# Supplementary material for: Nitrate radical generation via continuous generation of dinitrogen pentoxide in a laminar flow reactor coupled to an oxidation flow reactor
Source: Copernicus journal article supplement (doi:10.5194/amt-2019-470), 2020-01-23
Supplement: Supplementary file [file amt-2019-470-AC1-supplement.pdf]

## Response to reviewers for the paper “Nitrate radical generation via continuous generation of dinitrogen pentoxide in a laminar flow reactor coupled to an oxidation flow reactor.”

We thank the referee for his/her comments on our paper. To guide the review process, we have copied the referee’s comments in black text. Our responses are in blue text. Alterations to the paper are indicated in bold text below and in annotations to the revised manuscript.

### Anonymous Referee #1

#### General comments

1. Regarding the  $\text{NO}_3$  estimation equation for the OFR- $\text{iN}_2\text{O}_5$ , I wonder how would multiple generation oxidations influence the estimation of  $\text{NO}_3$  exposure. For example,  $\text{NO}_3$  radical oxidation of typical BVOCs (isoprene, monoterpenes, sesquiterpenes) produces carbonyls and even products with carbon double bonds. These products are highly reactive toward  $\text{NO}_3$  radicals which may affect the  $\text{NO}_3$  exposure estimation. However, these are not considered in the KimSim simulations. Secondly,  $\text{NO}_3$  oxidation of BVOCs has high SOA yields. I wonder how the uptake of  $\text{NO}_3$  and  $\text{N}_2\text{O}_5$  by the produced particles affect the simulations.

We added the following text to the end of Section 3.5:

P10, L24: “ $(\text{NO}_3\text{R})_{\text{ext}}$  of a system will change over the course of multiple generations of  $\text{NO}_3$  oxidation due to changes in kinetic rate coefficients between different species and  $\text{NO}_3$  ( $k_{\text{NO}_3}$ ). The sensitivity of Eq. 5 to changes in  $(\text{NO}_3\text{R})_{\text{ext}}$  depends in part on the relative magnitudes of  $(\text{NO}_3\text{R})_{\text{ext}}$  and the internal  $\text{NO}_3$  reactivity,  $(\text{NO}_3\text{R})_{\text{int}}$ , which is approximately equal to  $k_{\text{NO}_2+\text{NO}_3}[\text{NO}_2]$ . If  $(\text{NO}_3\text{R})_{\text{int}} \gg (\text{NO}_3\text{R})_{\text{ext}}$ , changes in  $(\text{NO}_3\text{R})_{\text{ext}}$  would have minimal influence on Eq. 5.

In one case study, we examined changes in  $(\text{NO}_3\text{R})_{\text{ext}}$  following conversion of biogenic VOCs (BVOCs) to gas-phase carbonyl oxidation products with known  $k_{\text{NO}_3}$  values. Table S5 compares  $k_{\text{NO}_3}$  of isoprene to methyl vinyl ketone and methacrolein,  $\alpha$ -pinene to pinonaldehyde, sabinene to sabinaketone, and 3-carene to caronaldehyde. In the limit where 100% of each BVOC is converted to its carbonyl oxidation product(s),  $(\text{NO}_3\text{R})_{\text{ext}}$  decreases by a factor of 200 or greater. Unsaturated organic nitrates that are generated from  $\text{BVOC} + \text{NO}_3$  may also be reactive towards  $\text{NO}_3$ , but  $k_{\text{NO}_3}$  for these species are not available.

In another case study, we examined changes in  $(\text{NO}_3\text{R})_{\text{ext}}$  following conversion of BVOCs to SOA. An effective  $k_{\text{NO}_3}$  for SOA was calculated using the following equation adapted from Lambe et al. (2009):

$$k_{\text{NO}_3} = \frac{3}{2} \frac{\gamma \times \bar{c} \times M_{\text{SOA}} \times F_{\text{diff}}}{D_p \times \rho_p \times N_A}$$

where  $F_{\text{diff}}$  is a correction factor accounting for diffusion limitations to the particle surface in the transition regime (Fuchs and Sutugin, 1970):

$$F_{\text{diff}} = \frac{1 + 6 \times \frac{D_{\text{NO}_3}}{\bar{c} \times D_p}}{1 + 10.26 \times \frac{D_{\text{NO}_3}}{\bar{c} \times D_p} + 47.88 \times \left( \frac{D_{\text{NO}_3}}{\bar{c} \times D_p} \right)^2}$$

and  $\gamma$  is the fraction of collisions between  $\text{NO}_3$  and SOA leading to reaction,  $D_p$  is the surface area-weighted mean particle diameter,  $\rho_p$  is the particle density,  $N_A$  is Avogadro’s number,  $c$  is the mean molecular speed of  $\text{NO}_3$  ( $3.2 \times 10^4 \text{ cm s}^{-1}$  at  $T = 298 \text{ K}$ ),  $M$  is the mean molecular weight of the SOA, and  $D_{\text{NO}_3} = 0.08 \text{ cm}^2 \text{ s}^{-1}$  is

the  $\text{NO}_3$  diffusion coefficient in air (Rudich et al., 1996). Figure S4 shows  $k_{\text{SOA}+\text{NO}_3}$  as a function of  $D_p$  ranging from 1 to 1000 nm assuming  $\rho_p = 1.4 \text{ g cm}^{-3}$ ,  $M_{\text{SOA}} = 250 \text{ g mol}^{-1}$  (Nah et al., 2016) and an upper limit  $\gamma = 0.1$  for BVOC-derived SOA (Ng et al., 2017). For reference, the range of slowest (isoprene) and fastest (humulene)  $k_{\text{BVOC}+\text{NO}_3}$  are indicated by the vertical blue line on the y-axis. In the limit where 100% of a BVOC is converted to SOA,  $(\text{NO}_3\text{R})_{\text{ext}}$  decreases by a factor of 10 or greater depending on  $k_{\text{BVOC}+\text{NO}_3}$  and  $D_p$ .

Taken together, these results suggest that  $(\text{NO}_3\text{R})_{\text{ext}}$  decreases following  $\text{NO}_3$  oxidation of BVOCs to carbonyl oxidation products and/or SOA. In this case, inputting  $(\text{NO}_3\text{R})_{\text{ext}}$  of the BVOC precursor to Eq. 5 generates a lower limit to  $(\text{NO}_3)_{\text{exp}}$  over multiple generations of  $\text{NO}_3$  oxidation. Results for other systems will depend on  $k_{\text{NO}_3}$  values of associated gas- and condensed-phase precursors and their oxidation products.”

Table S5 and Figure S4 were added to the supplement:

**Table S5.** Bimolecular rate coefficients between selected biogenic volatile organic compounds (BVOCs) and  $\text{NO}_3$ , and BVOC +  $\text{NO}_3$  carbonyl oxidation products and  $\text{NO}_3$ . Rate coefficients were obtained from Ng et al. (2017) and references therein, and are given in units of  $\text{cm}^3 \text{ molecules}^{-1} \text{ s}^{-1}$ .

| BVOC             | $k_{\text{NO}_3}$     | Oxidation Product   | $k_{\text{NO}_3}$     |
|------------------|-----------------------|---------------------|-----------------------|
| isoprene         | $6.5 \times 10^{-13}$ | methyl vinyl ketone | $< 6 \times 10^{-16}$ |
|                  |                       | methacrolein        | $3.4 \times 10^{-15}$ |
| $\alpha$ -pinene | $6.2 \times 10^{-12}$ | pinonaldehyde       | $2.0 \times 10^{-14}$ |
| 3-carene         | $9.1 \times 10^{-12}$ | caronaldehyde       | $2.5 \times 10^{-14}$ |
| sabinene         | $1.0 \times 10^{-11}$ | sabinaketone        | $3.6 \times 10^{-16}$ |

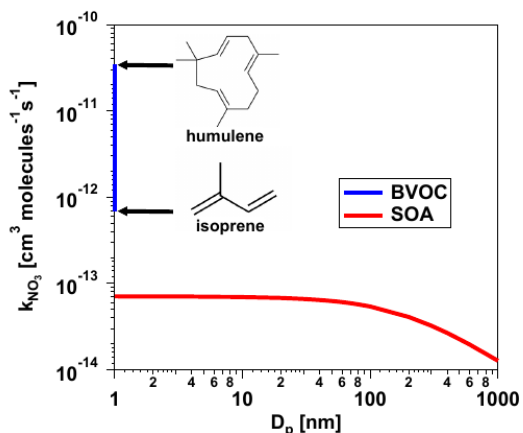

**Figure S4.** Effective rate constant between  $\text{NO}_3$  and SOA particles ( $k_{\text{NO}_3}$ ) calculated using Eq. 6 assuming  $\rho_p = 1.4 \text{ g cm}^{-3}$ ,  $M_{\text{SOA}} = 250 \text{ g mol}^{-1}$  and  $\gamma = 0.1$ .

The following citations were added to references:

N. A. Fuchs and A. G. Sutugin: Highly Dispersed Aerosols, Ann Arbor Science Publishers, Newton, MA, 1970.

A. T. Lambe, M. A. Miracolo, C. J. Hennigan, A. L. Robinson, and N. M. Donahue, Effective Rate Constants and Uptake Coefficients for the Reactions of Organic Molecular Markers (*n*-Alkanes, Hopanes, and

Steranes) in Motor Oil and Diesel Primary Organic Aerosols with Hydroxyl Radicals, *Environ. Sci. Technol.* 43(23) 8794-8800, <https://doi.org/10.1021/es901745h>, 2009.

Y. Rudich, R. K. Talukdar, T. Imamura, R.W. Fox, and A.R. Ravishankara, Uptake of NO<sub>3</sub> on KI solutions: rate coefficient for the NO<sub>3</sub> + I<sup>-</sup> reaction and gas-phase diffusion coefficients for NO<sub>3</sub>, *Chem. Phys. Lett.*, 261(4-5), 467-473, [https://doi.org/10.1016/0009-2614\(96\)00980-3](https://doi.org/10.1016/0009-2614(96)00980-3), 1996.

Specific comments:

- 2) BBCES measuring the NO<sub>3</sub>:
  - a. The author stated that “ $I(\lambda)$  and  $I_0(\lambda)$  were the measured transmitted intensities in the presence and absence of NO<sub>3</sub>”. How was the “absence of NO<sub>3</sub>” achieved?

This is now specified in the text (p4, L16) (see below).

- b. The equation grading the calculation of  $\alpha(\lambda)$  is not correct. The  $\alpha(\lambda)$  in the cavity also contributed by the bath gas beyond the NO<sub>3</sub> radicals.

The equation is correct. Additional of information is now provided in the text to avoid any misunderstanding in the equation.

We modified the text as follows (changes bolded):

P4, L4: direct measurements of NO<sub>3</sub> generated via OR-iN<sub>2</sub>O<sub>5</sub> were performed using a newly developed Incoherent Broad Band Cavity Enhanced Absorption Spectroscopy (IBBCEAS) technique (Cirtog et al., manuscript in preparation, **Fouqueau et al., 2020**).

P4, L11: Briefly, measurements were conducted by exciting a high-finesse optical cavity formed by two high reflectivity mirrors with an incoherent broad-band-source centered on the  $\lambda = 662$  nm absorption cross section of NO<sub>3</sub> ( $2 \times 10^{-17}$  cm<sup>2</sup>, **Orphal et al., 2003**).

P4, L16: “**Where  $\alpha(\lambda)$  is the absorption coefficient of the OFR sample in the instrument,  $I(\lambda)$  and  $I_0(\lambda)$  were the measured transmitted intensities in the presence and absence of the sample,  $d = 61$  was the distance between the cavity mirrors, and  $R(\lambda)$  was the mirror reflectivity ( $\sim 99.98\%$ ).  $I_0(\lambda)$  was obtained by stopping the OFR sample through the instrument and flowing nitrogen from a cylinder (Air Liquide). A period of at least 30 s was allowed between the measurement of  $I_0(\lambda)$  and  $I(\lambda)$  to ensure the complete purge of the instrument.  $R(\lambda)$  was measured before each experiment using a certified calibration cylinder containing 600 ppb NO<sub>2</sub> in zero air (Air Liquide).**”

- c. The NO<sub>3</sub> radicals are highly reactive and can easily lose to the walls. What is the transmission efficiency of NO<sub>3</sub> from the OFR to the cavity?
      - d. Due to different loss rates of NO<sub>3</sub> and N<sub>2</sub>O<sub>5</sub> to the wall, the equilibrium of NO<sub>3</sub> and N<sub>2</sub>O<sub>5</sub> may change. How good is the measured NO<sub>3</sub> concentration in the CRD represent the NO<sub>3</sub> radical concentration in the reactor?

We modified the text as follows (changes bolded):

P4, L20-27: “ Concentrations were calculated by applying a least square fit to the measured  $\alpha(\lambda)$  considering the absorbing species in the sample:

$$\alpha(\lambda) = [NO_2]\sigma_{[NO_2]}(\lambda) + [NO_3]\sigma_{[NO_3]}(\lambda) + [O_3]\sigma_{[O_3]} + p(\lambda)$$

with  $NO_2$ ,  $NO_3$  and  $O_3$  being the species absorbing in the spectral region of the instrument,  $\sigma(\lambda)$  are the respective absorption cross sections convoluted with the apparatus function (Vandaele et al., 1998; Orphal et al., 2003, Voigt et al, 2001) and  $p(\lambda)$  is a cubic polynomial to correct baseline deformations due to small LED intensity variations. To avoid saturation of the IBBCEAS in these experiments, the OFR sample was diluted by a controlled dilution factor ranging from 9 to 41 and the detection response was deliberately lowered by reducing the optical path length. Sampling lines and instrument (cavity) were made of PFA. The residence time in the IBBCEAS sampling line and instrument ranged from 8.3 to 21.8 s. At these residence times, the calculated transmission efficiency of  $NO_3$  from the OFR to the IBBCEAS instrument ranged from 0.3 to 11% assuming a  $NO_3$  wall loss rate constant of  $0.27 \text{ s}^{-1}$  (Kennedy et al., 2011). Corrections to measured  $NO_2$  and  $NO_3$  values accounting for  $N_2O_5$  thermal decomposition,  $N_2O_5$  wall loss, and sample dilution in the IBBCEAS inlet were additionally applied to results presented in this paper.”

The following citations were added to references:

Fouqueau, A., Cirtog, M., Cazaunau, M., Pangui, E., Zapf, P., Siour, G., Landsheere, X., Méjean, G., Romanini, D. and Picquet-Varrault, B.: Implementation of an IBBCEAS technique in an atmospheric simulation chamber for in situ  $NO_3$  monitoring: characterization and validation for kinetic studies, Atmos Meas Tech, (amt-2020-103), in review, 2020.

S. Voigt, J. Orphal, K. Bogumil, and J.P. Burrows, "The temperature dependence (203-293 K) of the absorption cross sections of  $O_3$  in the 230-850 nm region measured by Fourier-transform spectroscopy", J. Photochem. Photobiol. A: Chem. 143, 1-9 (2001); DOI: [10.1016/S1010-6030\(01\)00480-4](https://doi.org/10.1016/S1010-6030(01)00480-4)

- 3) a) The description of the results in section 3.4 is not consistent with the results in the figure. “First, at  $[O_3]_{0,LFR} < 1000 \text{ ppm}$  and  $[NO_2]_{0,LFR}:[O_3]_{0,LFR} = 0.1$  to 1.8, maximum  $NO_{3exp}$  increased with decreasing  $[NO_2]_{0,LFR}:[O_3]_{0,LFR}$  (Fig. 7a).” It is very hard to see the results in the figure when  $[O_3]_{0,LFR} < 100 \text{ ppm}$ . For me, it looks like maximum  $NO_{3exp}$  first increase with increasing  $[NO_2]_{0,LFR}:[O_3]_{0,LFR}$  ratio and then decrease with it, especially when  $[O_3]_{0,LFR}$  was in the range of 100-1000ppm”

We modified the text as follows:

“First, at  $[O_3]_{0,LFR} < 1000 \text{ ppm}$  and  $[NO_2]_{0,LFR}:[O_3]_{0,LFR} = 0.01$  to 1.8, maximum  $NO_{3exp}$  increased with  $[NO_2]_{0,LFR}:[O_3]_{0,LFR}$  prior to decreasing at  $[NO_2]_{0,LFR}:[O_3]_{0,LFR} > 1.0$  (Fig. 7a).”

b) “Above  $[O_3]_{0,LFR} \approx 2000 \text{ ppm}$ ,  $NO_{3exp}$  was less sensitive to  $[NO_2]_{0,LFR}:[O_3]_{0,LFR}$ .” This is true except for  $[NO_2]_{0,LFR}:[O_3]_{0,LFR} = 2.0$ .

We modified the text as follows:

“Above  $[O_3]_{0,LFR} \approx 2000 \text{ ppm}$  and below  $[NO_2]_{0,LFR}:[O_3]_{0,LFR} = 2.0$ ,  $NO_{3exp}$  was less sensitive to  $[NO_2]_{0,LFR}:[O_3]_{0,LFR}$ .”

c) “Second, maximum NO<sub>3</sub>:O<sub>3</sub> increased with increasing [NO<sub>2</sub>]<sub>0,LFR</sub>: [O<sub>3</sub>]<sub>0,LFR</sub> (Figure 7c).” This statement is true only when the O<sub>3</sub> was above 1000 ppm, even get rid of the results from [NO<sub>2</sub>]<sub>0,LFR</sub>: [O<sub>3</sub>]<sub>0,LFR</sub>=2.0.

We modified the text as follows:

“Second, maximum NO<sub>3</sub>:O<sub>3</sub> increased with increasing [NO<sub>2</sub>]<sub>0,LFR</sub>: [O<sub>3</sub>]<sub>0,LFR</sub> **above [O<sub>3</sub>]<sub>0,LFR</sub> = 1000 ppm** (Figure 7c).”

d) “conversion of O<sub>3</sub> to N<sub>2</sub>O<sub>5</sub> inside the LFR” I fell more comfortable to say “conversion of O<sub>3</sub> to O<sub>2</sub> inside the LFR”.

We modified the text as follows:

“conversion of O<sub>3</sub> to O<sub>2</sub> inside the LFR”

- 4) The authors tried to investigate the RO<sub>2</sub> fate and considered “RO<sub>2</sub> react with NO, NO<sub>2</sub>, NO<sub>3</sub>, HO<sub>2</sub>, or other RO<sub>2</sub> to generate alkoxy (RO) radicals, peroxy nitrates (RO<sub>2</sub>NO<sub>2</sub>), hydroperoxides or organic peroxides, and may additionally undergo autooxidation via sequential isomerization and O<sub>2</sub> addition.” Recent studies by Berndt et al. (2018) revealed that self-and cross-reaction of RO<sub>2</sub> radicals would produce dimers effectively. How could this process affect the fate of the RO<sub>2</sub> radical?

Self- and cross-reactions of RO<sub>2</sub> were considered in the model – please see the last two rows in Table S3, reproduced below for reference. Under the conditions that were studied this process was minor compared to RO<sub>2</sub> + NO<sub>3</sub> and RO<sub>2</sub> + NO<sub>2</sub>.

**Table S3.** KinSim mechanism used to model destruction of alkyl and acyl organic peroxy radicals formed from VOC + NO<sub>3</sub> reactions in the OFR. Kinetic data is adapted from (Orlando and Tyndall, 2012).

| Reactant 1              | Reactant 2      | Product 1               | Product 2       | Product 3 | A <sub>∞</sub> | E <sub>∞</sub> | n <sub>∞</sub> | A <sub>0</sub> | E <sub>0</sub> | n <sub>0</sub> |
|-------------------------|-----------------|-------------------------|-----------------|-----------|----------------|----------------|----------------|----------------|----------------|----------------|
| VOC                     | NO <sub>3</sub> | alkylRO2                |                 |           | 0 or 2.5E-12   | 0              | 0              | 0              | 0              | 0              |
| VOC                     | NO <sub>3</sub> | acylRO2                 |                 |           | 2.5E-12 or 0   | 0              | 0              | 0              | 0              | 0              |
| alkylRO2                | NO              |                         |                 |           | 2.7E-12        | -360           | 0              | 0              | 0              | 0              |
| acylRO2                 | NO              |                         |                 |           | 7.5E-12        | -290           | 0              | 0              | 0              | 0              |
| alkylRO2                | NO <sub>2</sub> | alkylRO2NO <sub>2</sub> |                 |           | 6.1E-12        | 0              | 0              | 1.3E-30        | 6.2            | 0.31           |
| alkylRO2NO <sub>2</sub> |                 | alkylRO2                | NO <sub>2</sub> |           | 8.8E+15        | 10440          | 0              | 0.00048        | 9285           | 0.31           |
| acylRO2                 | NO <sub>2</sub> | acylRO2NO <sub>2</sub>  |                 |           | 1.2E-11        | 0              | 0.9            | 2.7E-28        | 7.1            | 0.3            |
| acylRO2NO <sub>2</sub>  |                 | acylRO2                 | NO <sub>2</sub> |           | 5.4E+16        | 13830          | 0              | 0.0049         | 12100          | 0.3            |
| alkylRO2                | NO <sub>3</sub> | alkylRO                 | NO <sub>2</sub> |           | 2.4E-12        | 0              | 0              | 0              | 0              | 0              |
| acylRO2                 | NO <sub>3</sub> | acylRO                  | NO <sub>2</sub> |           | 3.2E-12        | 0              | 0              | 0              | 0              | 0              |
| alkylRO2                | HO <sub>2</sub> |                         |                 |           | 7.4E-13        | -700           | 0              | 0              | 0              | 0              |
| acylRO2                 | HO <sub>2</sub> |                         |                 |           | 5.2E-13        | -980           | 0              | 0              | 0              | 0              |
| alkylRO2                | acylRO2         |                         |                 |           | 2.2E-12        | -500           | 0              | 0              | 0              | 0              |
| acylRO2                 | acylRO2         |                         |                 |           | 2.9E-12        | -500           | 0              | 0              | 0              | 0              |

In response to the reviewer’s comment, we conducted additional sensitivity studies where the RO<sub>2</sub> + RO<sub>2</sub> rate constant was assumed to be 1x10<sup>-10</sup> cm<sup>3</sup> molecule<sup>-1</sup> s<sup>-1</sup>, close to the values reported by Berndt et al. (2018). The sensitivity cases cover the range of conditions used in Section 3.4 and those with NO<sub>3</sub>R<sub>ext</sub> (and

hence VOC concentration) increased by a factor of 10. In these cases, the relative contribution of RO<sub>2</sub> + RO<sub>2</sub> to RO<sub>2</sub> fate is always <1%. To include this information in the paper, we modified the text as follows:

P8, L23-25: “Under almost all OFR-iN<sub>2</sub>O<sub>5</sub> conditions shown in Figure 7, RO<sub>2</sub> reactions with NO, HO<sub>2</sub>, and RO<sub>2</sub> were minor (< 1%) loss pathways compared to reaction with NO<sub>2</sub> and NO<sub>3</sub>. **We conductive a model sensitivity analysis in which the RO<sub>2</sub> + RO<sub>2</sub> reaction rate was enhanced by increasing NO<sub>3</sub>R<sub>ext</sub> from 0.07 to 0.7 s<sup>-1</sup> and increasing the RO<sub>2</sub> + RO<sub>2</sub> rate constant from 1x10<sup>-11</sup> to 1x10<sup>-10</sup> cm<sup>3</sup> molecule<sup>-1</sup> s<sup>-1</sup> (Berndt et al., 2018, 2018a). Despite these perturbations, the relative contribution of RO<sub>2</sub> + RO<sub>2</sub> reactions to total RO<sub>2</sub> loss remained < 1% across this range of OFR-iN<sub>2</sub>O<sub>5</sub> conditions.”**

The following citations were added to References:

Berndt, T.; Mentler, B.; Scholz, W.; Fischer, L.; Herrmann, H.; Kulmala, M.; Hansel, A., Accretion Product Formation from Ozonolysis and OH Radical Reaction of alpha-Pinene: Mechanistic Insight and the Influence of Isoprene and Ethylene. Environ. Sci. Technol. 2018, 52, (19), 11069-11077.

Berndt, T.; Scholz, W.; Mentler, B.; Fischer, L.; Herrmann, H.; Kulmala, M.; Hansel, A., Accretion Product Formation from Self- and Cross-Reactions of RO<sub>2</sub> Radicals in the Atmosphere. Angew Chem Int Edit 2018, 57, 1, 3820-3824.
